# Supplementary material
Source: publisher site journal article supplement (https://www.spandidos-publications.com/8138/downloadSupplementary)
Supplement: Supplementary file 1 [file downloadSupplementary]

**Table SI.** Quantitative analysis of FRA1 expression in MRL/lpr and control mice

| <b>Assay</b>                  | <b>Group</b> | <b>n</b> | <b>Mean ± SD</b> | <b>Cohen's d</b> | <b>t (df=4)</b> | <b>P value (equal variance)</b> | <b>P value (Welch)</b> | <b>P value (Mann-Whitney)</b> | <b>Post hoc power (<math>\alpha=0.05</math>)</b> |
|-------------------------------|--------------|----------|------------------|------------------|-----------------|---------------------------------|------------------------|-------------------------------|--------------------------------------------------|
| IHC (% area)                  | Control      | 3        | 0.0207±0.0048    | 7.08             | 8.68            | 9.7x10 <sup>-4</sup>            | 0.0079                 | 0.10                          | >99.9%                                           |
| IHC (% area)                  | MRL/lpr      | 3        | 0.1069±0.0165    | 7.08             | 8.68            | 9.7x10 <sup>-4</sup>            | 0.0079                 | 0.10                          | >99.9%                                           |
| Western blotting (gray value) | Control      | 3        | 0.1280±0.0240    | 7.88             | 9.65            | 6.5x10 <sup>-4</sup>            | 0.0025                 | 0.10                          | >99.9%                                           |
| Western blotting (gray value) | MRL/lpr      | 3        | 0.4233±0.0473    | 7.88             | 9.65            | 6.5x10 <sup>-4</sup>            | 0.0025                 | 0.10                          | >99.9%                                           |

IHC, immunohistochemistry; MRL/lpr, a systemic lupus erythematosus mouse model.

**Table SII.** shRNA and primer sequences for lentivirus vector.

| <b>Gene</b> | <b>Sequence</b>                                                 |
|-------------|-----------------------------------------------------------------|
| shRNA       | 5'-GGAAGGAACTGACCGACTTAT-3'                                     |
| shNC        | 5'-GTTCTCCGAACGTGTCACGTC-3'                                     |
| FRA1        | Sense: 5'-ACCTCCATAGAAGATTCTAGAATGTTCCGAGACTTCGGGA-3'           |
|             | Antisense:<br>5'-GATCGCAGATCCTTCGCGGCCGCTCACAAAGCGAGGAGGGTTG-3' |

NC, non-coding; shRNA, short hairpin RNA.
